# Supplementary material
Source: Elsevier journal article supplement (https://www.sciencedirect.com/science/article/pii/S2444382418302098)
Supplement: mmc1 [file S2444382418302098:mmc1.docx]

Material complementario 1.MOOSE checklist

| ***Criteria*** | | ***Brief description of how the criteria were handled in the meta-analysis*** |
| --- | --- | --- |
| ***Reporting of background should include*** | |  |
| *√* | *Definiciónproblema* | p.1-2 |
| *√* | *Hypothesis statement* | p.2 |
| *√* | *Description of study outcomes* | p.2 |
| *√* | *Type of exposure or intervention used* | p.2-3 |
| *√* | *Type of study designs used* | p.2-3 |
| *√* | *Study population* | p.2-3 |
| ***Reporting of search strategy should include*** | |  |
| *√* | *Qualifications of searchers* | p.3-4 |
| *√* | *Search strategy, including time period included in the synthesis and keywords* | p.3-4 |
| *√* | *Databases and registries searched* | p.3-4 |
| *√* | *Search software used, name and version, including special features* | p.3-4 |
| *√* | *Use of hand searching* | p.3-4 |
| *√* | *List of citations located and those excluded, including justifications* | P 3-4, figura 1, archive complementario 2 |
| *√* | *Method of addressing articles published in languages other than English* | No excepto para lenguas que provienen del latín |
| *√* | *Method of handling abstracts and unpublished studies* | No |
| *√* | *Description of any contact with authors* | No. |
| ***Reporting of methods should include*** | |  |
| *√* | *Description of relevance or appropriateness of studies assembled for assessing the hypothesis to be tested* | Figura 2 |
| *√* | *Rationale for the selection and coding of data* | Figura 2 |
| *√* | *Assessment of confounding* | Figura 2 |
| *√* | *Assessment of study quality, including blinding of quality assessors; stratification or regression on possible predictors of study results* | Figura 2 |
| *√* | *Assessment of heterogeneity* | Figura 2 |
| *√* | *Description of statistical methods in sufficient detail to be replicated* |  |
| *√* | *Provision of appropriate tables and graphics* | Tabla 1 y tabla 2 |
| ***Reporting of results should include*** | |  |
| *√* | *Graph summarizing individual study estimates and overall estimate* |  |
| *√* | *Table giving descriptive information for each study included* | Tabla 1 y table 2 |
| *√* | *Results of sensitivity testing* |  |
| *√* | *Indication of statistical uncertainty of findings* |  |
| ***Reporting of discussion should include*** | |  |
| *√* | *Quantitative assessment of bias* | Figura 2 |
| *√* | *Justification for exclusion* | Archivo complementario 2 |
| *√* | *Assessment of quality of included studies* | Archivo complementario 2 |
| ***Reporting of conclusions should include*** | |  |
| *√* | *Consideration of alternative explanations for observed results* | p. 6-7 |
| *√* | *Generalization of the conclusions* | P. 6-7 |
| *√* | *Guidelines for future research* | p. 6-7 |
| *√* | *Disclosure of funding source* | p. 6-7 |

Principio del formulario
